# Supplementary material
Source: PubMed Central journal article supplement (PMC6224778)
Supplement: mmc1.pdf [file mmc1.pdf]

**Biophysical Journal, Volume 115**

**Supplemental Information**

**Single-Molecule Analyses Reveal Rhomboid Proteins Are Strict and Functional Monomers in the Membrane**

**Alex J.B. Kreutzberger and Siniša Urban**

**Table S1.** Summary of photobleaching events for purified proteins in planar supported lipid bilayers. All bacterial proteins were reconstituted in 70:30 DMPE:DMPG except GlpG-Halo in PO and GlpG-Halo in *E. coli*, which were 70:30 POPE:POPG and *E. coli* polar lipid extract, respectively. DmR4 was reconstituted in yeast phospholipids.

| <b>Protein</b>               | <b>1-step</b> | <b>2-step</b> | <b>3-step</b> | <b>4-step</b> | <b>Total Events</b> |
|------------------------------|---------------|---------------|---------------|---------------|---------------------|
| $\Delta$ NGlpG-HaloC         | 163           | 13            | 0             | 0             | 176                 |
| GlpG-HaloC                   | 146           | 6             | 0             | 0             | 152                 |
| MsbA-HaloC                   | 10            | 106           | 0             | 0             | 116                 |
| AqpZ-HaloC                   | 4             | 4             | 5             | 81            | 94                  |
| GlpF-HaloC                   | 3             | 3             | 3             | 44            | 53                  |
| LacY-HaloC                   | 92            | 5             | 0             | 0             | 97                  |
| GST- $\Delta$ NGlpG-HaloC    | 11            | 90            | 0             | 1             | 102                 |
| GST-GlpG-HaloC               | 8             | 84            | 0             | 0             | 92                  |
| AqpZ-HaloC C20S              | 242           | 12            | 0             | 0             | 254                 |
| GlpF-HaloC E43A              | 249           | 6             | 0             | 0             | 255                 |
| HiGlpG CysC-JF549            | 120           | 0             | 0             | 0             | 120                 |
| NCys-JF549-HiGlpG            | 140           | 2             | 0             | 0             | 142                 |
| $\Delta$ N-GlpG CysC-JF549   | 123           | 4             | 0             | 0             | 127                 |
| NCys-JF549- $\Delta$ N-GlpG  | 138           | 4             | 0             | 0             | 142                 |
| GlpG CysC-JF549              | 168           | 5             | 0             | 0             | 173                 |
| NCys-JF549-GlpG              | 144           | 1             | 0             | 0             | 145                 |
| AarA-HaloC                   | 160           | 8             | 0             | 0             | 168                 |
| NHalo-DmR4                   | 190           | 2             | 0             | 0             | 192                 |
| NHalo-DmR4 + Calcium         | 156           | 5             | 0             | 0             | 161                 |
| GlpG-HaloC in PO             | 205           | 10            | 0             | 0             | 215                 |
| GlpG-HaloC in <i>E. coli</i> | 145           | 6             | 0             | 0             | 151                 |

**Table S2.** Summary of photobleaching events of rhomboid proteins in HEK293T cells.

| <b>Protein</b> | <b>1-step</b> | <b>2-step</b> | <b>3-step</b> | <b>4-step</b> | <b>Total Events</b> |
|----------------|---------------|---------------|---------------|---------------|---------------------|
| NHalo-RHBDL2   | 138           | 6             | 1             | 0             | 145                 |
| NHalo-RHBDL3   | 307           | 12            | 1             | 0             | 320                 |
| iRhom1-HaloC   | 238           | 9             | 1             | 0             | 248                 |
| iRhom2-HaloC   | 173           | 7             | 0             | 0             | 180                 |
| NHalo-EhR1     | 363           | 12            | 3             | 0             | 378                 |
| NHalo-TvR1     | 253           | 7             | 1             | 0             | 261                 |
| RHBDL2-HaloC   | 97            | 6             | 0             | 0             | 103                 |
| NHalo-iRhom2   | 135           | 7             | 0             | 0             | 142                 |
| EhR1-HaloC     | 130           | 6             | 0             | 0             | 136                 |
| NHalo-DmR4     | 98            | 8             | 0             | 0             | 106                 |

**Table S3.** Summary of photobleaching events of proteins in 0.1% DDM detergent bound to Ni-coverslips.

| <b>Protein</b>       | <b>1-step</b> | <b>2-step</b> | <b>3-step</b> | <b>4-step</b> | <b>Total Events</b> |
|----------------------|---------------|---------------|---------------|---------------|---------------------|
| LacY-HaloC           | 241           | 8             | 1             | 0             | 250                 |
| MsbA-HaloC           | 6             | 250           | 0             | 0             | 256                 |
| AqpZ-HaloC           | 3             | 7             | 1             | 352           | 363                 |
| GlpF-HaloC           | 3             | 11            | 1             | 428           | 443                 |
| $\Delta$ NGlpG-HaloC | 53            | 67            | 0             | 0             | 120                 |
| GlpG-HaloC           | 45            | 103           | 0             | 0             | 148                 |
| NCys-JF549-HiGlpG    | 102           | 220           | 0             | 0             | 322                 |
| NHalo-DmR4           | 94            | 76            | 0             | 0             | 170                 |

**Table S4.** Summary of photobleaching events of proteins in 0.1% NG detergent bound to Ni-coverslips.

| <b>Protein</b>       | <b>1-step</b> | <b>2-step</b> | <b>3-step</b> | <b>4-step</b> | <b>Total Events</b> |
|----------------------|---------------|---------------|---------------|---------------|---------------------|
| LacY-HaloC           | 152           | 3             | 0             | 0             | 155                 |
| MsbA-HaloC           | 10            | 285           | 0             | 3             | 298                 |
| AqpZ-HaloC           | 1             | 5             | 0             | 165           | 171                 |
| GlpF-HaloC           | 1             | 4             | 1             | 120           | 126                 |
| $\Delta$ NGlpG-HaloC | 6             | 278           | 1             | 0             | 285                 |
| GlpG-HaloC           | 11            | 191           | 1             | 1             | 204                 |
| NCys-JF549-HiGlpG    | 20            | 207           | 0             | 0             | 227                 |
| NHalo-DmR4           | 26            | 108           | 0             | 0             | 134                 |
